# Supplementary material for: Comparative Influence of Ocean Conditions on Yellowfin and Atlantic Bluefin Tuna Catch from Longlines in the Gulf of Mexico
Source: PLOS journal article supplement (doi:10.1371/journal.pone.0010756), 2010-05-28
Supplement: S1 (10.1371/journal.pone.0010756.s001) [file journal.pone.0010756.s001]

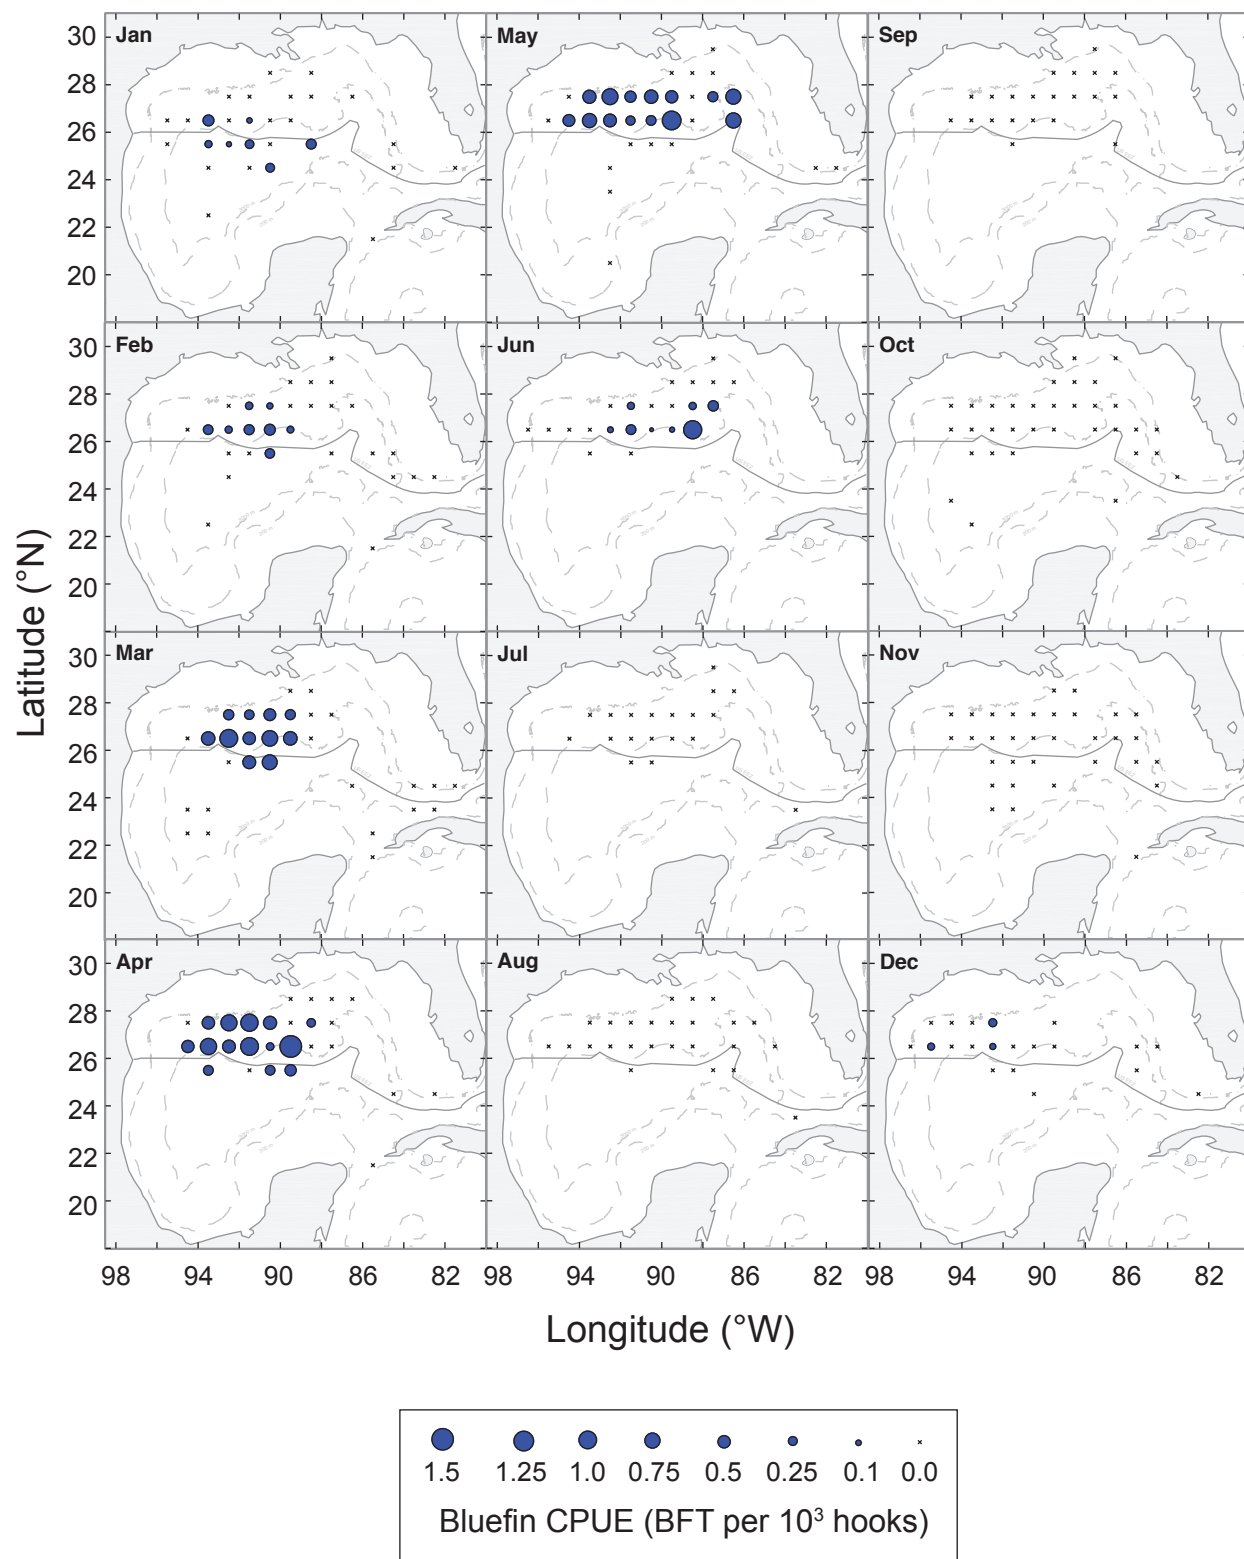

**Figure S1. Spatiotemporal variability of bluefin tuna CPUE.** Crosses indicate locations where more than 1000 hooks were set but no bluefin were caught.
